# Supplementary material for: Comprehensive evaluation of typical planetary boundary layer (PBL) parameterization schemes in China – Part 2: Influence of uncertainty factors
Source: Copernicus journal article supplement (doi:10.5194/gmd-16-6833-2023), 2023-11-24
Supplement: Supplementary file 1 [file gmd-16-6833-2023-supplement.zip]

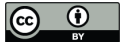

*Supplement of*

## **Comprehensive evaluation of typical planetary boundary layer (PBL) parameterization schemes in China – Part 2: Influence of uncertainty factors**

**Wenxing Jia et al.**

*Correspondence to:* Xiaoye Zhang (xiaoye@cma.gov.cn)

- [gmd-16-6833-2023-supplement-title-page.pdf](#)
- Supplement
  - [2 manuscript-supplements.docx](#)
  - [L62\\_namelist.input](#)

The copyright of individual parts of the supplement might differ from the article licence.
